# Supplementary material
Source: Springer Nature journal article supplement (https://www.springermedizin.de/resource/supplementary/12885_2010_2169_MOESM5_ESM.pdf/9460676)
Supplement: MOESM5 [file 9460676]

**control**

**6.6±0.9%**

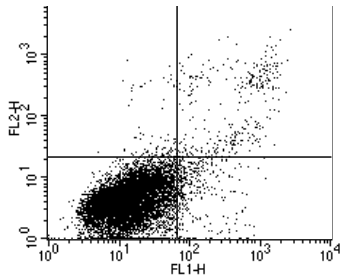

**CQ pre-treatment**

**5.9±1.7%**

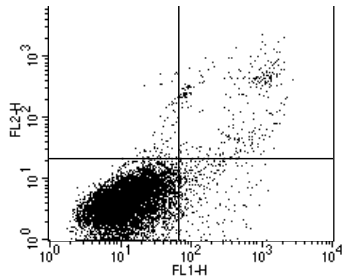

**5-FU**

**16.5±3.9%**

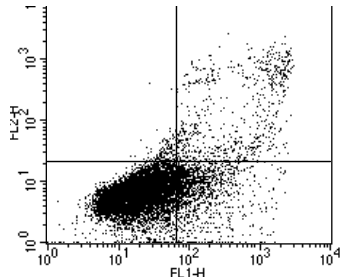

**CQ + 5-FU**

**19.2±4.7%**

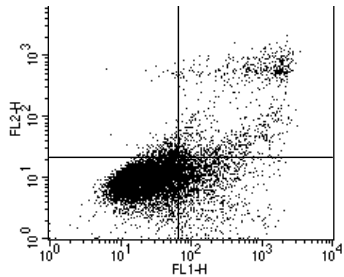

**PI** ↑  
The percentage of the  
annexin V<sup>+</sup> apoptotic  
cells

**Annexin V-FITC** →
